# Supplementary material
Source: publisher figshare collection journal article supplement (https://asha.figshare.com/ndownloader/files/33126188)
Supplement: Supplementary file 1 [file 33126188]

**Supplemental Material S1.** Mean (standard deviation) sound pressure levels captured by the MIRE technique by frequency between the two measurements (open ear and closed ear) for each headset.

|                  | 250 Hz        | 500 Hz        | 1000 Hz       |
|------------------|---------------|---------------|---------------|
| Measurement      | <i>M (SD)</i> | <i>M (SD)</i> | <i>M (SD)</i> |
| Monaural Headset | −0.4 (0.75)   | −0.6 (0.25)   | −0.17 (0.5)   |
| Binaural Headset | −0.5 (0.79)   | −1.4 (0.35)   | −1.17 (1.6)   |

*Note.* The occlusion effect was assessed in five normal adults. MIRE measurements were taken without and with headphones (mono and binaural)—open ear and closed ear respectively—while external sounds (broadband noise) were presented in free field. Correction factors for open ear and closed ear were applied according to ISO 11904-1 before the difference was calculated by frequency.
